# Supplementary material
Source: publisher figshare collection journal article supplement (https://acs.figshare.com/ndownloader/files/34417809)
Supplement: Supplementary file 1 [file 34417809]

# Precise Synthesis of Structurally Diverse Aggregation-Induced Emission-Active Polyacrylates by Cu(0)-Catalyzed SET-LRP with Macromolecular Structure-Correlated Emission

*Zhiqiang Wei, Dong Chen, Xinru Zhang, Li Wang\*, WantaiYang\**

State Key Laboratory of Chemical Resource Engineering, Beijing University of Chemical  
Technology, Beijing 100029, China.

## ▪ Table of Contents:

|                                                                                            |            |
|--------------------------------------------------------------------------------------------|------------|
| <b>1. Structural Characterization of Initiators (TPE-nBr, <math>n = 1-4</math>) .....</b>  | <b>S4</b>  |
| <b>2. SET-LRP of MA and <i>t</i>BA Initiated with TPE-nBr (<math>n = 1-4</math>) .....</b> | <b>S10</b> |
| <b>3. AIE Behavior of TPE-PMA and TPE-PAA .....</b>                                        | <b>S16</b> |

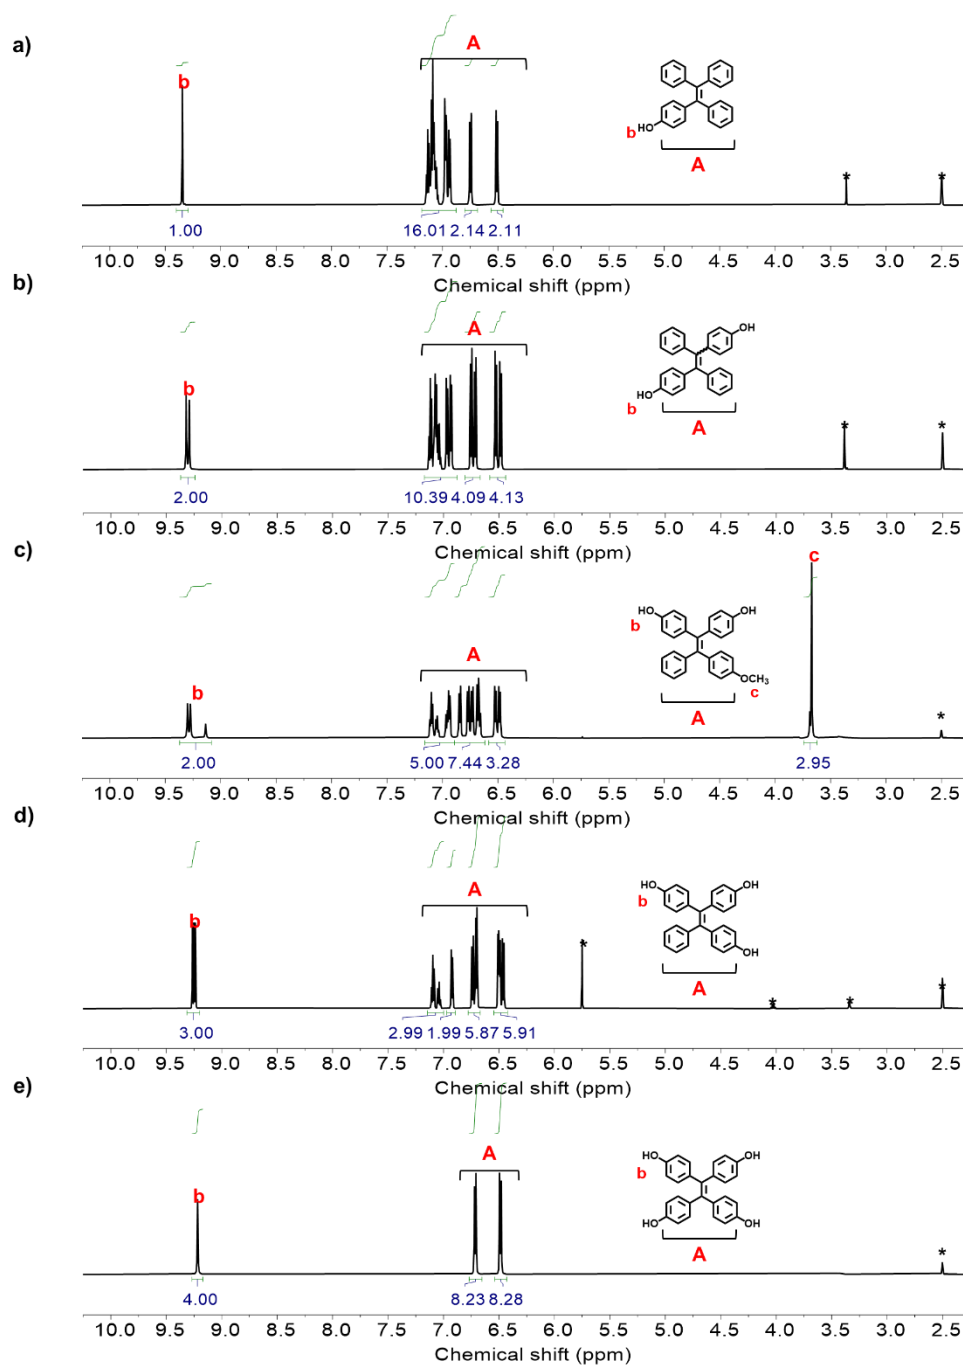

**Figure S1.** <sup>1</sup>H-NMR spectrum of (a) TPE-1OH, (b) TPE-2OH, (c) compound **1**, (d) TPE-3OH and (e) TPE-4OH in DMSO-*d*<sub>6</sub>. <sup>1</sup>H NMR resonances from residual solvent in DMSO-*d*<sub>6</sub> are indicated by an asterisk (\*).

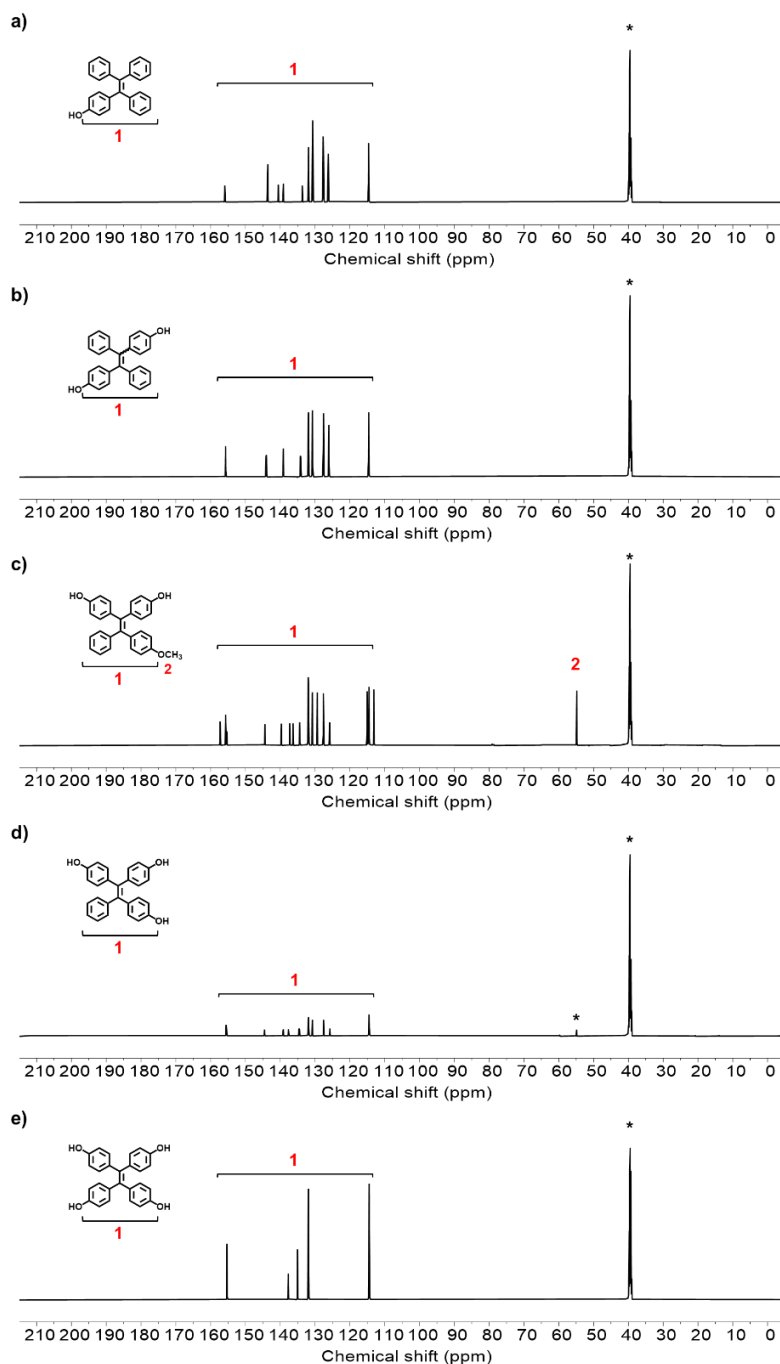

**Figure S2.**  $^{13}\text{C}$ -NMR spectrum of (a) TPE-1OH, (b) TPE-2OH, (c) compound **1**, (d) TPE-3OH in  $\text{DMSO}-d_6$  and (e) TPE-4OH in  $\text{DMSO}-d_6$ .  $^{13}\text{C}$  NMR resonances from residual solvent in  $\text{DMSO}-d_6$  are indicated by an asterisk (\*).

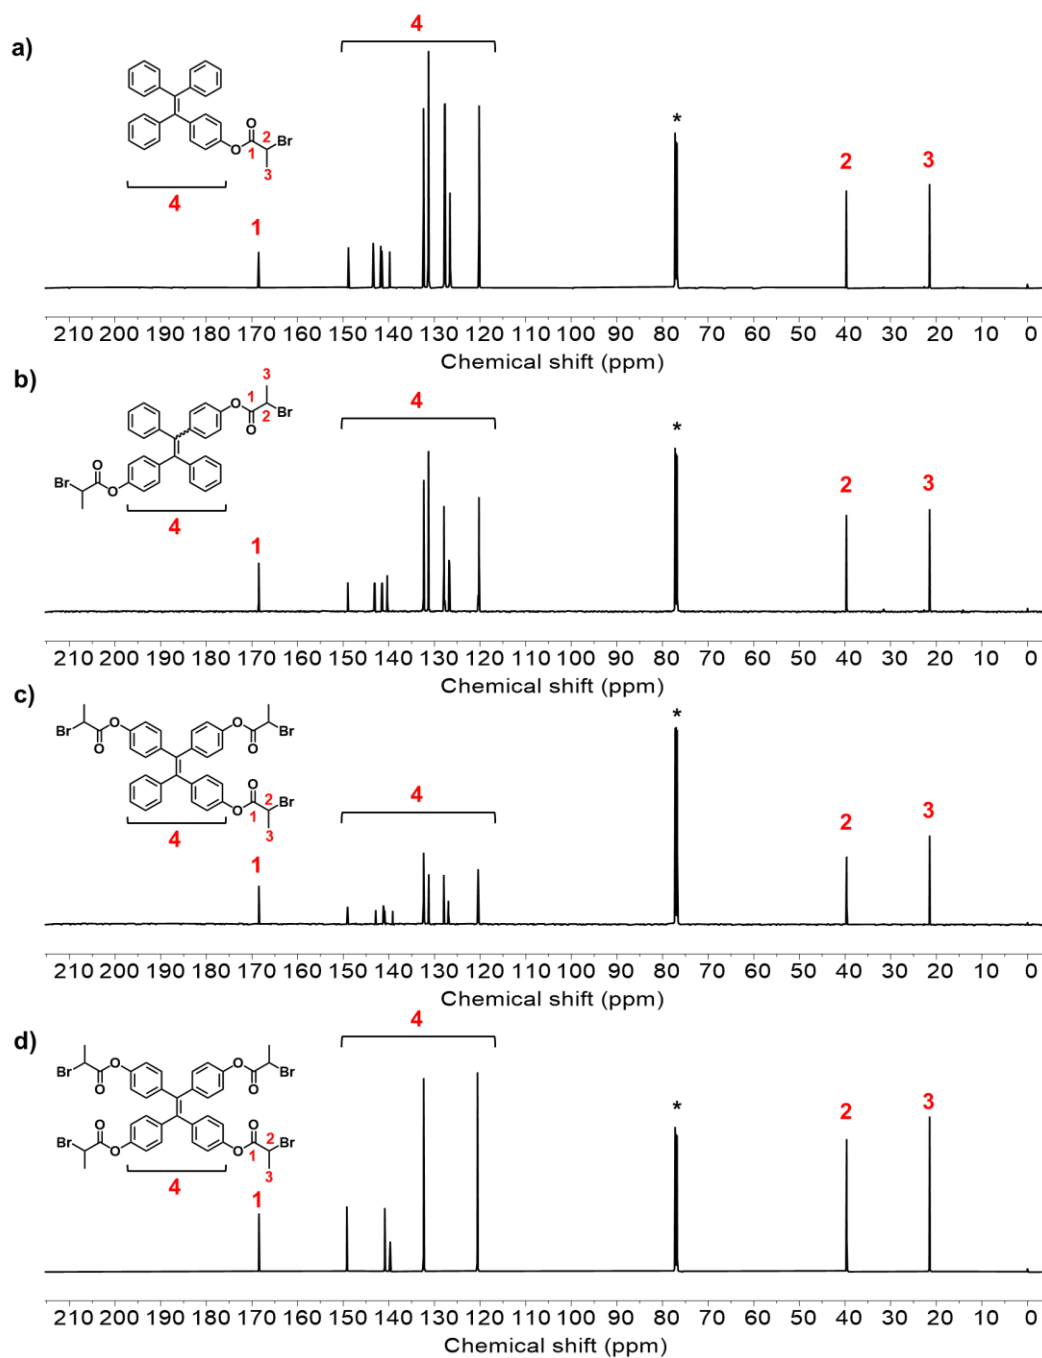

**Figure S3.**  $^{13}\text{C}$ -NMR spectrum of (a) TPE-1Br, (b) TPE-2Br, (c) TPE-3Br and (d) TPE-4Br in  $\text{CDCl}_3$ .  $^{13}\text{C}$  NMR resonances from residual solvent in  $\text{CDCl}_3$  are indicated by an asterisk (\*).

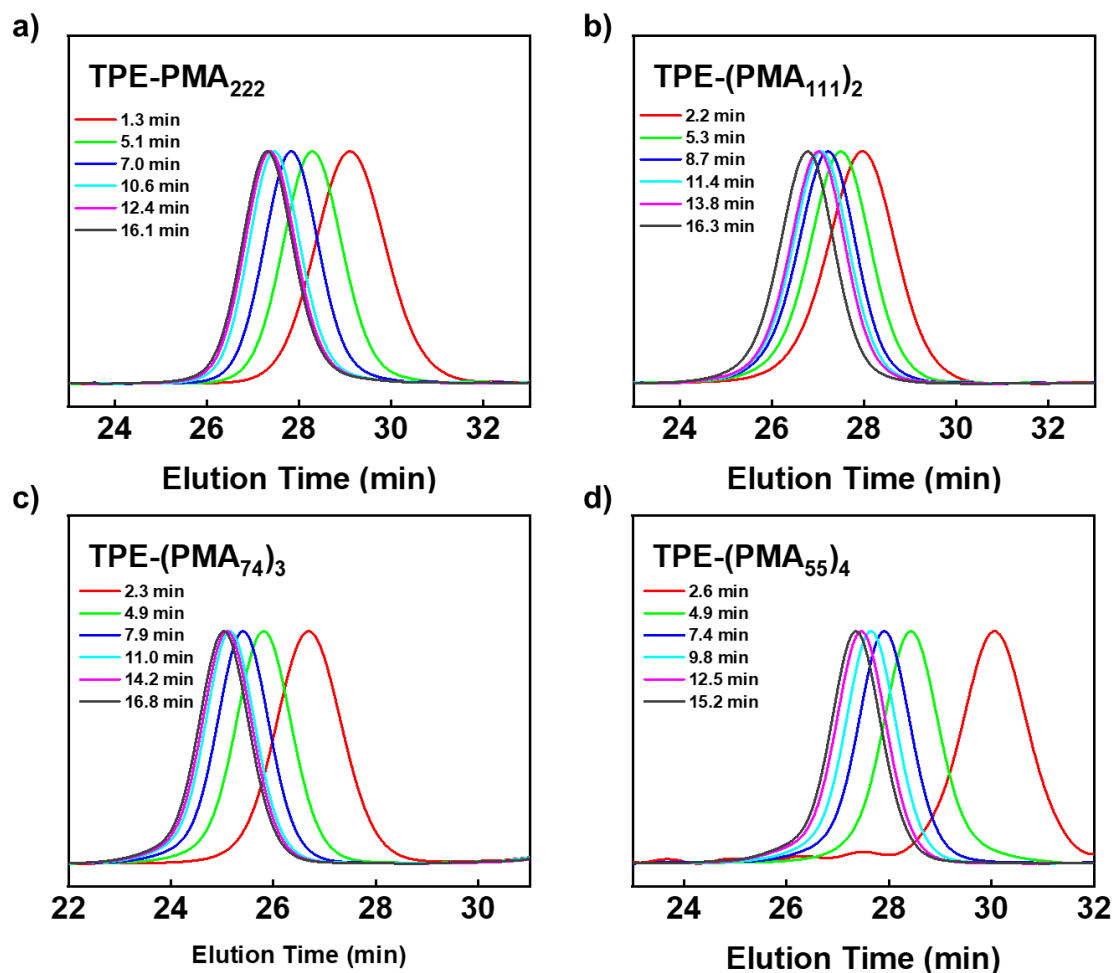

**Figure S4.** GPC traces of TPE-PMAs obtained by the SET-LRP of MA in DMSO initiated from (a) TPE-1Br, (b) TPE-2Br, (c) TPE-3Br and (d) TPE-4Br and catalyzed by the 12.5 cm nonactivated Cu(0) wire at 25 °C. Reaction conditions: MA = 1 mL, DMSO = 0.5 mL,  $[MA]_0/[Initiator]_0/[Me_6-TREN]_0 = 222/1/0.1$ .

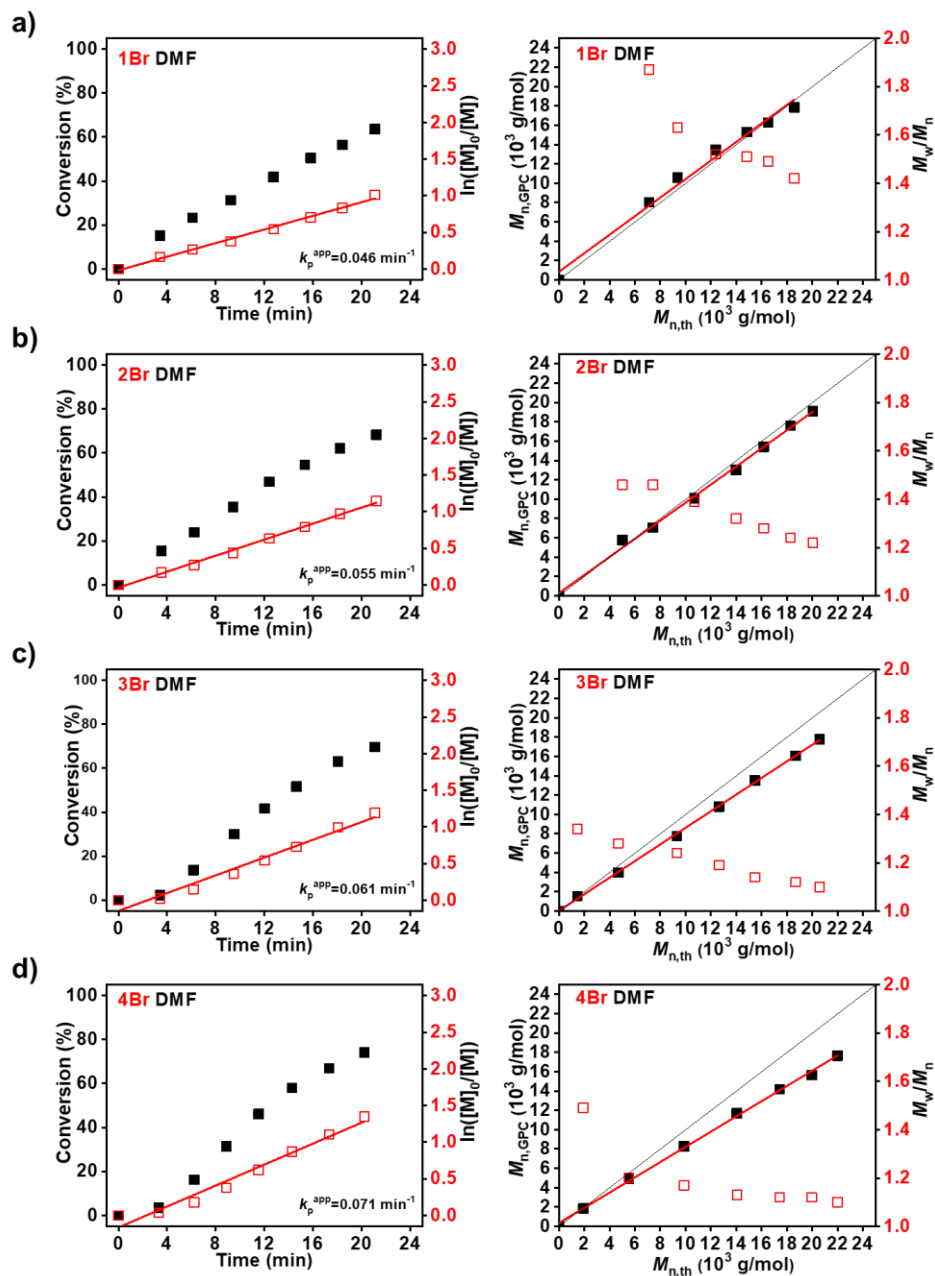

**Figure S5.** Monomer conversion, kinetic plots, and evolution of  $M_{n,GPC}$  and  $\bar{D}$  ( $M_w/M_n$ ) for the SET-LRP of *t*BA in DMF initiated from (a) TPE-1Br, (b) TPE-2Br, (c) TPE-3Br and (d) TPE-4Br and catalyzed by the 12.5 cm nonactivated Cu(0) wire at 25 °C. Reaction conditions: *t*BA = 1 mL, DMF = 0.5 mL,  $[tBA]_0/[Initiator]_0/[Me_6-TREN]_0 = 222/1/0.1$ .

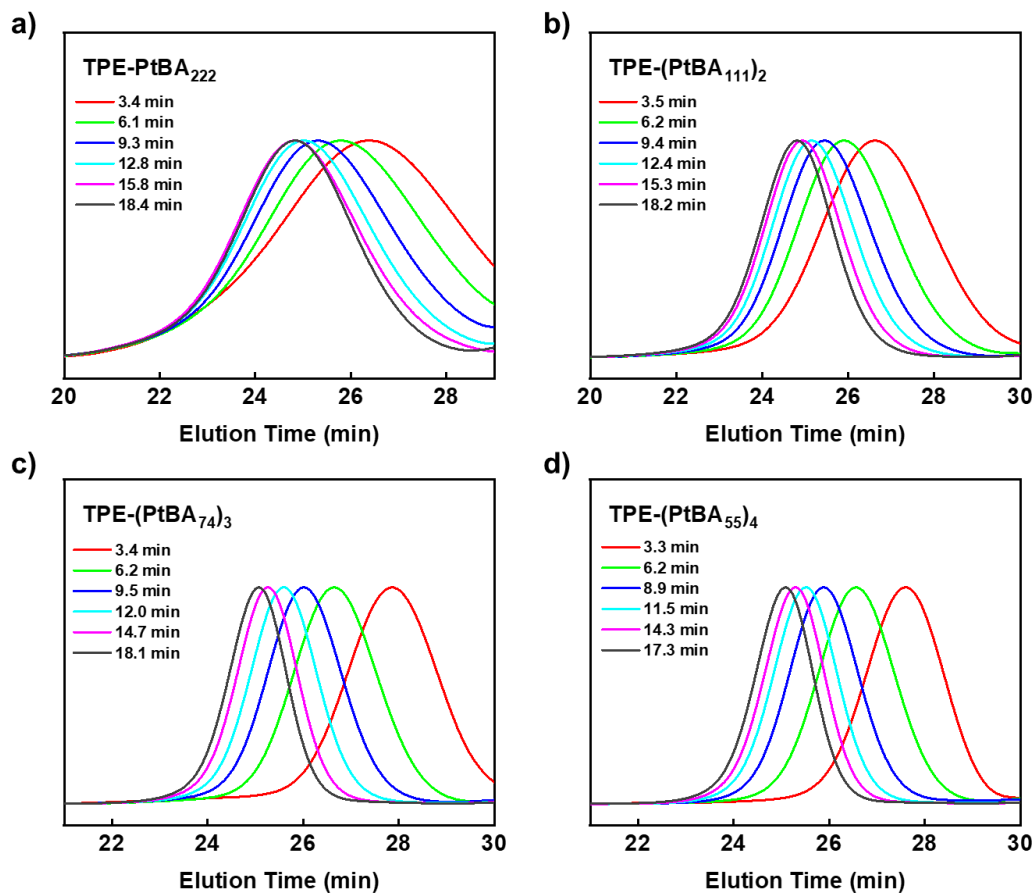

**Figure S6.** GPC traces of TPE-*Pt*BA obtained by the SET-LRP of *t*BA in DMF initiated from (a) TPE-1Br, (b) TPE-2Br, (c) TPE-3Br and (d) TPE-4Br and catalyzed by the 12.5 cm nonactivated Cu(0) wire at 25 °C. Reaction conditions: *t*BA = 1 mL, DMF = 0.5 mL,  $[tBA]_0/[Initiator]_0/[Me_6-TREN]_0 = 222/1/0.1$ .

**Table S1** End-group fidelity of TPE-PMA<sup>a</sup>

|                                   | TPE-PMA <sub>50</sub> | TPE-(PMA <sub>25</sub> ) <sub>2</sub> | TPE-(PMA <sub>17</sub> ) <sub>3</sub> | TPE-(PMA <sub>12.5</sub> ) <sub>4</sub> |
|-----------------------------------|-----------------------|---------------------------------------|---------------------------------------|-----------------------------------------|
| F <sup>Br</sup> / % <sup>a</sup>  | 98                    | 99                                    | 99                                    | 100                                     |
| F <sup>SPh</sup> / % <sup>b</sup> | 95                    | 93                                    | 95                                    | 98                                      |

<sup>a</sup> End-group fidelity of TPE-PMA from the SET-LRP of MA in DMSO initiated with TPE-nBr ( $n = 1-4$ ) and catalyzed by nonactivated Cu(0) wire at 25 °C: before (a) and after (b) the thio-bromo “click” reaction.

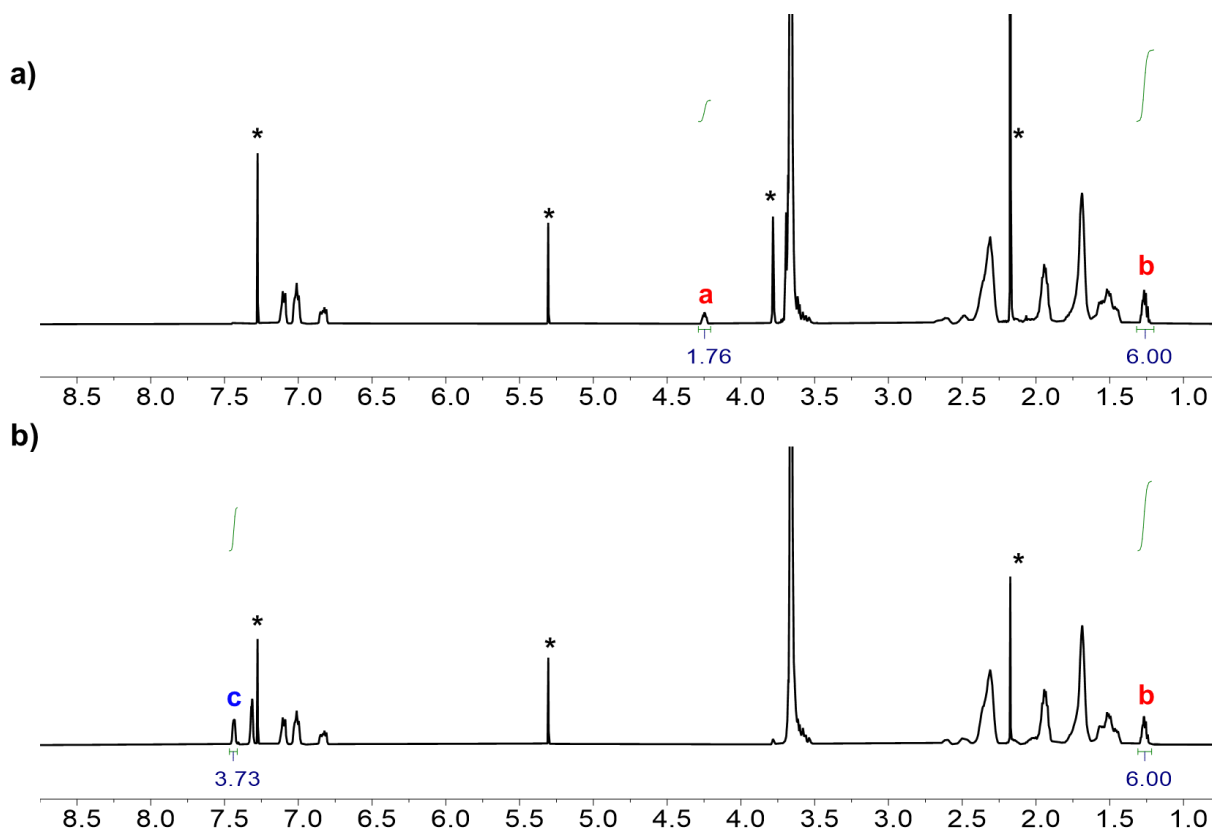

**Figure S7.** <sup>1</sup>H NMR spectra (600 MHz) of TPE-PMA at 88% conversion from the SET-LRP of MA in DMSO initiated with TPE-2Br and catalyzed by a nonactivated Cu(0) wire at 25 °C: before (a, F<sup>Br</sup> = 1.76/1.78\*100 = 99%) and after (b, F<sup>SPh</sup> = 3.73/4\*100 = 93%) the thio-bromo “click” reaction. Polymerization conditions: MA = 1 mL, DMSO = 0.5 mL, [MA]<sub>0</sub>/[TPE-2Br]<sub>0</sub>/[Me<sub>6</sub>-TREN]<sub>0</sub> = 50/1/0.1, 12.5 cm of the Cu(0) wire. <sup>1</sup>H NMR resonances from residual solvents in CDCl<sub>3</sub> are indicated by an asterisk (\*).

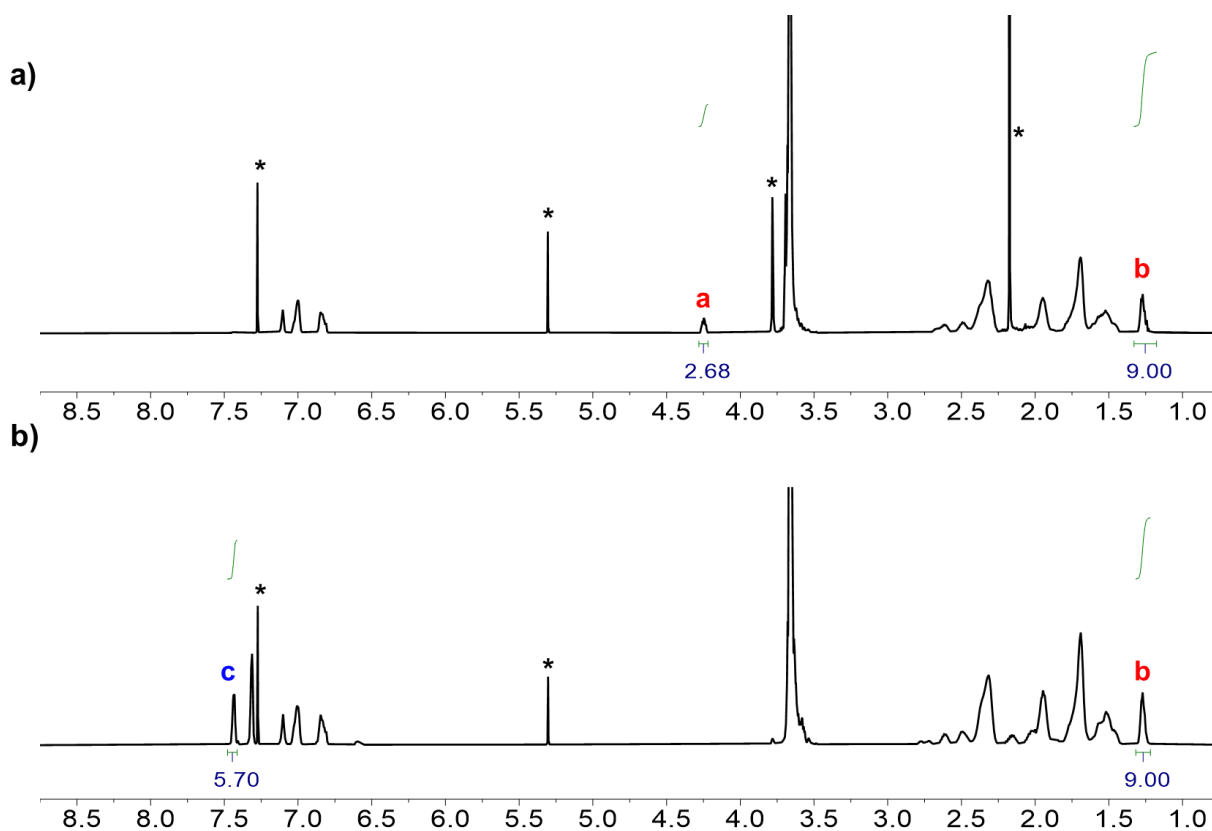

**Figure S8.**  $^1\text{H}$  NMR spectra (600 MHz) of TPE-PMA at 90% conversion from the SET-LRP of MA in DMSO initiated with TPE-3Br and catalyzed by a nonactivated Cu(0) wire at 25 °C: before (a,  $F^{\text{Br}} = 2.68/2.71 \times 100 = 99\%$ ) and after (b,  $F^{\text{SPh}} = 5.70/6 \times 100 = 95\%$ ) the thio-bromo "click" reaction. Polymerization conditions: MA = 1 mL, DMSO = 0.5 mL,  $[\text{MA}]_0/[\text{TPE-3Br}]_0/[\text{Me}_6\text{-TREN}]_0 = 50/1/0.1$ , 12.5 cm of the Cu(0) wire.  $^1\text{H}$  NMR resonances from residual solvents in  $\text{CDCl}_3$  are indicated by an asterisk (\*).

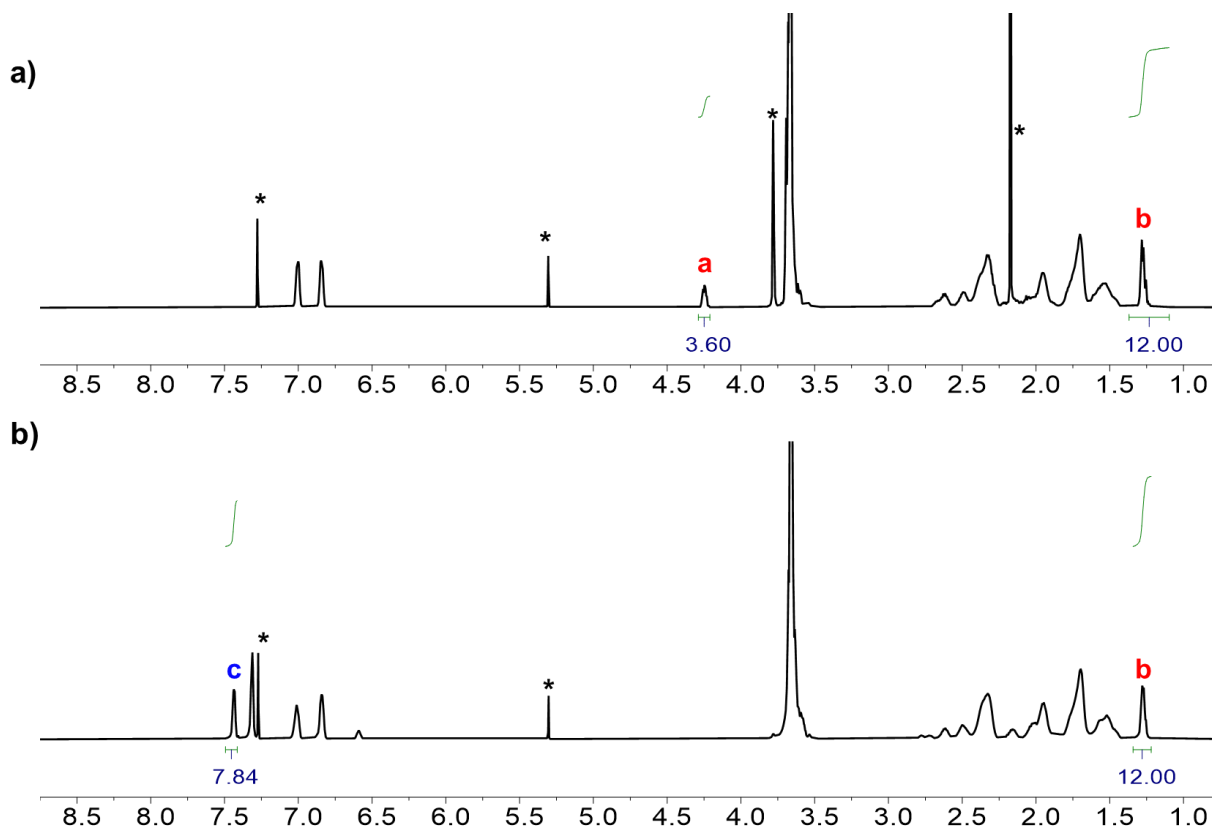

**Figure S9.**  $^1\text{H}$  NMR spectra (600 MHz) of TPE-PMA at 90% conversion from the SET-LRP of MA in DMSO initiated with TPE-4Br and catalyzed by a nonactivated Cu(0) wire at 25 °C: before (a,  $F^{\text{Br}} = 3.60/3.60 \times 100 = 100\%$ ) and after (b,  $F^{\text{SPh}} = 7.84/8 \times 100 = 98\%$ ) the thio-bromo "click" reaction. Polymerization conditions: MA = 1 mL, DMSO = 0.5 mL,  $[\text{MA}]_0/[\text{TPE-4Br}]_0/[\text{Me}_6\text{-TREN}]_0 = 50/1/0.1$ , 12.5 cm of the Cu(0) wire.  $^1\text{H}$  NMR resonances from residual solvents in  $\text{CDCl}_3$  are indicated by an asterisk (\*).

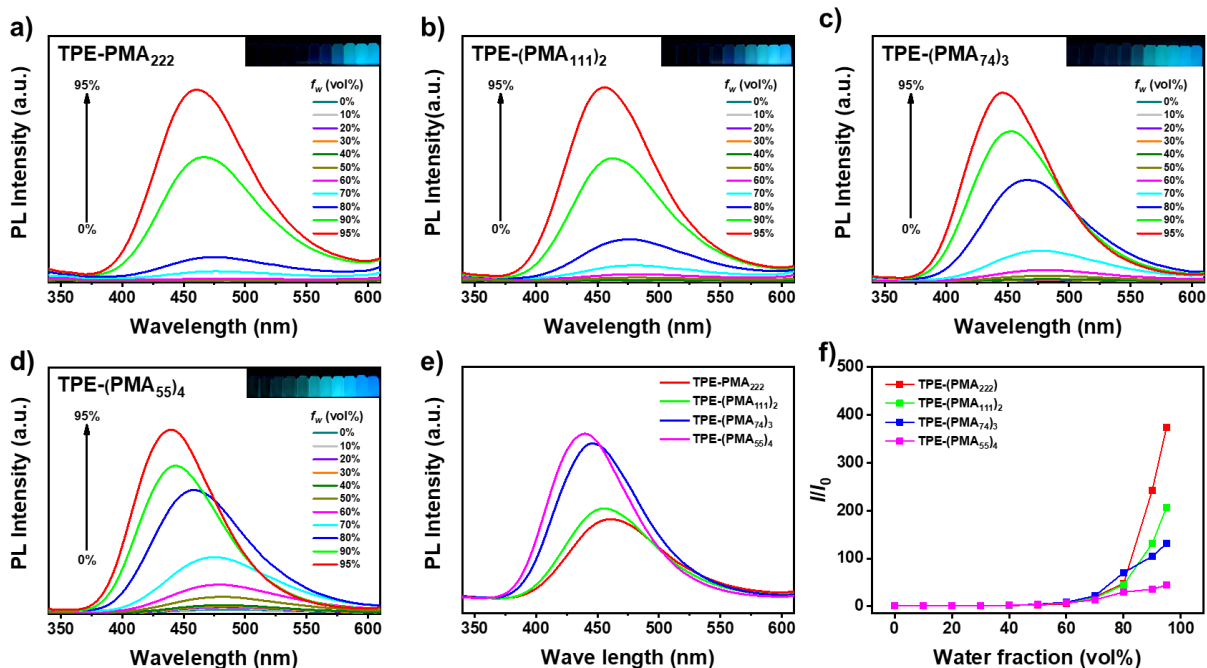

**Figure S10.** Photoluminescence (PL) spectra of (a) TPE-(PMA)<sub>222</sub>, (b) TPE-(PMA)<sub>111</sub>)<sub>2</sub>, (c) TPE-(PMA)<sub>74</sub>)<sub>3</sub> and (d) TPE-(PMA)<sub>55</sub>)<sub>4</sub> in THF/H<sub>2</sub>O mixtures with different  $f_w$ . (e) PL intensity of TPE-(PMA)<sub>n</sub> ( $n = 1-4$ ,  $[MA]_0/[TPE-nBr]_0 = 222/1$ ) in THF/H<sub>2</sub>O ( $f_w = 95\%$ ). (f)  $I/I_0$  of TPE-(PMA)<sub>n</sub> ( $n = 1-4$ ,  $[MA]_0/[TPE-nBr]_0 = 222/1$ ).  $[TPE] = 10 \mu\text{M}$ ; excitation wavelength: 320 nm;  $I_0$ : the PL intensity of the polymer in pure THF. The insets in panel (a)-(d) were taken under a hand-held UV lamp at 365 nm.

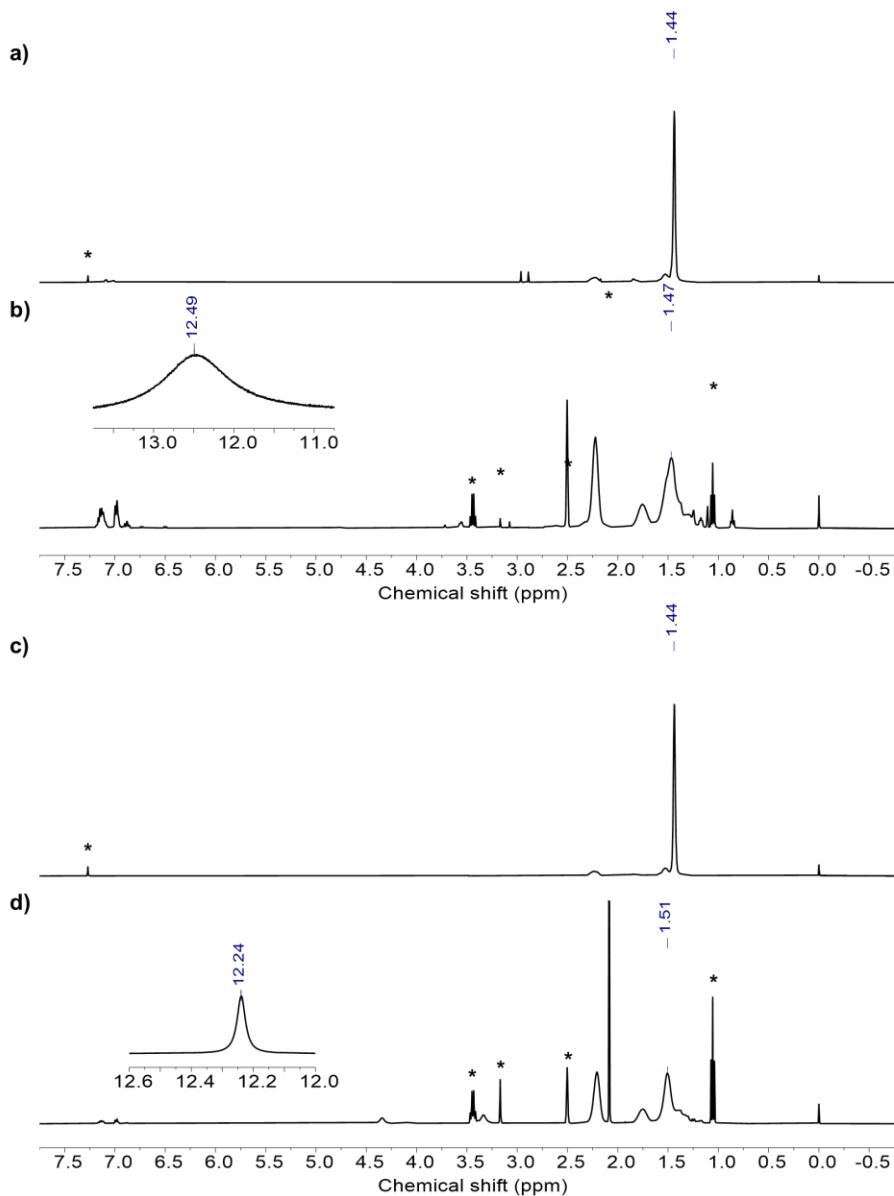

**Figure S11.**  $^1\text{H}$  NMR spectra of (a)TPE-PtBA<sub>50</sub> and (c)TPE-PtBA<sub>222</sub> in  $\text{CDCl}_3$  at 99% conversion from SET-LRP of *t*BA in DMF initiated with TPE-1Br and catalyzed by nonactivated Cu(0) wire at 25 °C.  $^1\text{H}$  NMR of (b) TPE-PAA<sub>50</sub> and (d) TPE-PAA<sub>222</sub> in  $\text{DMSO}-d_6$  obtained by hydrolysis of TPE-PtBA. Polymerization conditions: *t*BA = 1 mL, DMF = 0.5 mL,  $[t\text{BA}]_0/[\text{TPE-1Br}]_0/[\text{Me}_6\text{-TREN}]_0 = 50/1/0.1$  and  $[t\text{BA}]_0/[\text{TPE-1Br}]_0/[\text{Me}_6\text{-TREN}]_0 = 222/1/0.1$ , 12.5 cm of Cu(0) wire.  $^1\text{H}$  NMR resonances from residual solvents are indicated by an asterisk (\*).

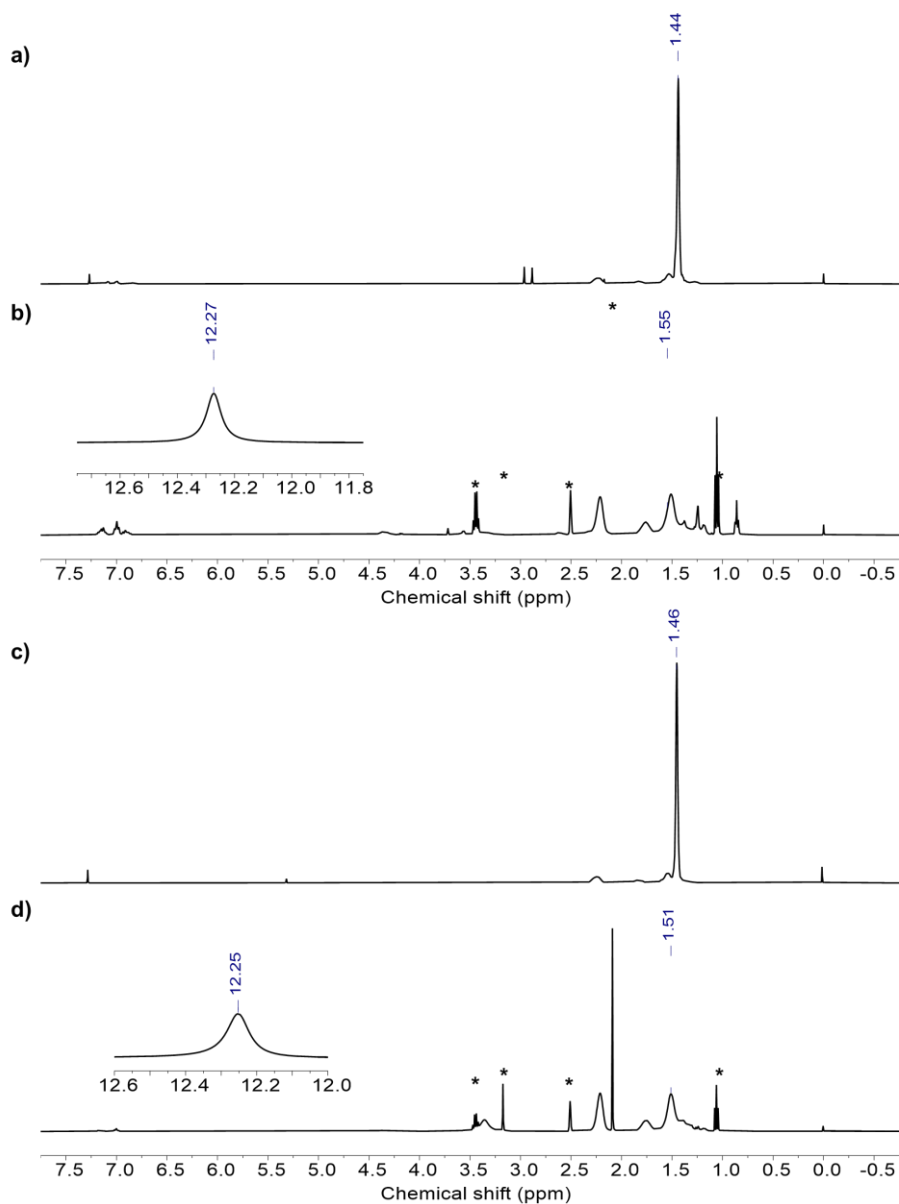

**Figure S12.**  $^1\text{H}$  NMR spectra of (a) TPE-(PtBA<sub>25</sub>)<sub>2</sub> and (c) TPE-(PtBA<sub>111</sub>)<sub>2</sub> in  $\text{CDCl}_3$  at 99% conversion from SET-LRP of *t*BA in DMF initiated with TPE-2Br and catalyzed by nonactivated Cu(0) wire at 25 °C.  $^1\text{H}$  NMR of (b) TPE-(PAA<sub>25</sub>)<sub>2</sub> and (d) TPE-(PAA<sub>111</sub>)<sub>2</sub> in  $\text{DMSO}-d_6$  obtained by hydrolysis of TPE-PtBA. Polymerization conditions: *t*BA = 1 mL, DMF = 0.5 mL,  $[\textit{t}\text{BA}]_0/[\text{TPE-2Br}]_0/[\text{Me}_6\text{-TREN}]_0 = 50/1/0.1$  and  $[\textit{t}\text{BA}]_0/[\text{TPE-2Br}]_0/[\text{Me}_6\text{-TREN}]_0 = 222/1/0.1$ , 12.5 cm of Cu(0) wire.  $^1\text{H}$  NMR resonances from residual solvents are indicated by an asterisk (\*).

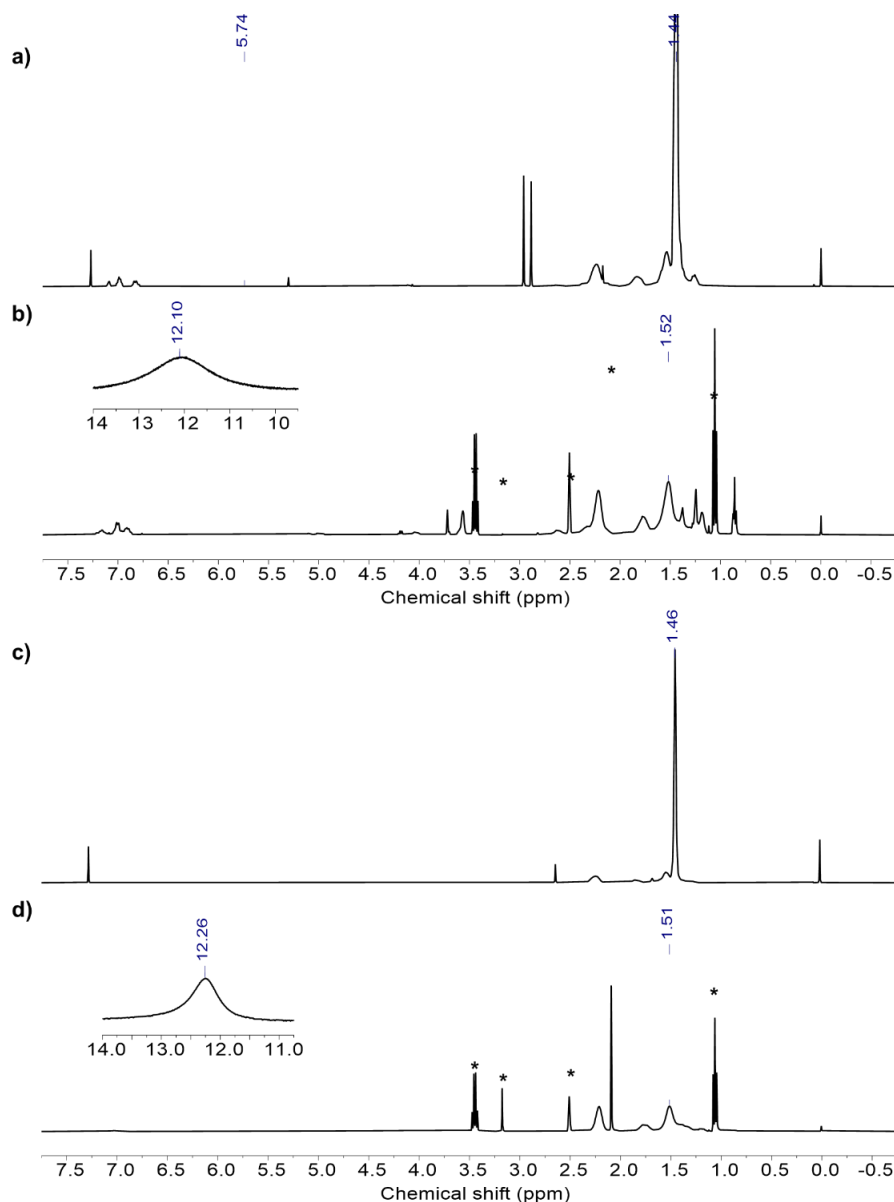

**Figure S13.**  $^1\text{H}$  NMR spectra of (a) TPE-(PtBA<sub>17</sub>)<sub>3</sub> and (c) TPE-(PtBA<sub>74</sub>)<sub>3</sub> in  $\text{CDCl}_3$  at 99% conversion from SET-LRP of *t*BA in DMF initiated with TPE-3Br and catalyzed by nonactivated Cu(0) wire at 25 °C.  $^1\text{H}$  NMR of (b) TPE-(PAA<sub>17</sub>)<sub>3</sub> and (d) TPE-(PAA<sub>74</sub>)<sub>3</sub> in  $\text{DMSO}-d_6$  obtained by hydrolysis of TPE-PtBA. Polymerization conditions: *t*BA = 1 mL, DMF = 0.5 mL,  $[\textit{t}\text{BA}]_0/[\text{TPE-3Br}]_0/[\text{Me}_6\text{-TREN}]_0 = 50/1/0.1$  and  $[\textit{t}\text{BA}]_0/[\text{TPE-3Br}]_0/[\text{Me}_6\text{-TREN}]_0 = 222/1/0.1$ , 12.5 cm of Cu(0) wire.  $^1\text{H}$  NMR resonances from residual solvents are indicated by an asterisk (\*).

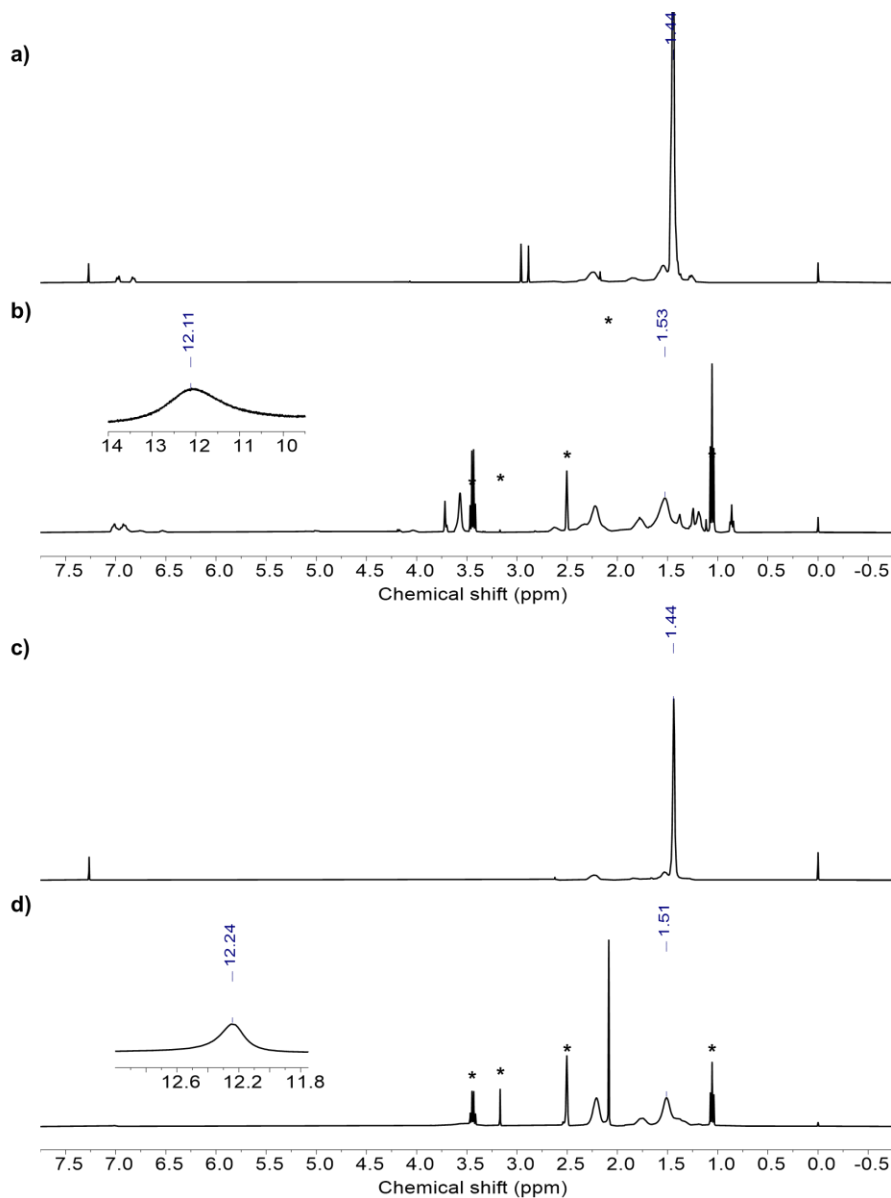

**Figure S14.**  $^1\text{H}$  NMR spectra of (a) TPE-(PtBA<sub>12</sub>)<sub>4</sub> and (c) TPE-(PtBA<sub>55</sub>)<sub>4</sub> in  $\text{CDCl}_3$  at 99% conversion from SET-LRP of *t*BA in DMF initiated with TPE-4Br and catalyzed by nonactivated Cu(0) wire at 25 °C.  $^1\text{H}$  NMR of (b) TPE-(PAA<sub>12</sub>)<sub>4</sub> and (d) TPE-(PAA<sub>55</sub>)<sub>4</sub> in  $\text{DMSO}-d_6$  obtained by hydrolysis of TPE-PtBA. Polymerization conditions: *t*BA = 1 mL, DMF = 0.5 mL,  $[\textit{t}\text{BA}]_0/[\text{TPE-4Br}]_0/[\text{Me}_6\text{-TREN}]_0 = 50/1/0.1$  and  $[\textit{t}\text{BA}]_0/[\text{TPE-4Br}]_0/[\text{Me}_6\text{-TREN}]_0 = 222/1/0.1$ , 12.5 cm of Cu(0) wire.  $^1\text{H}$  NMR resonances from residual solvents are indicated by an asterisk (\*).

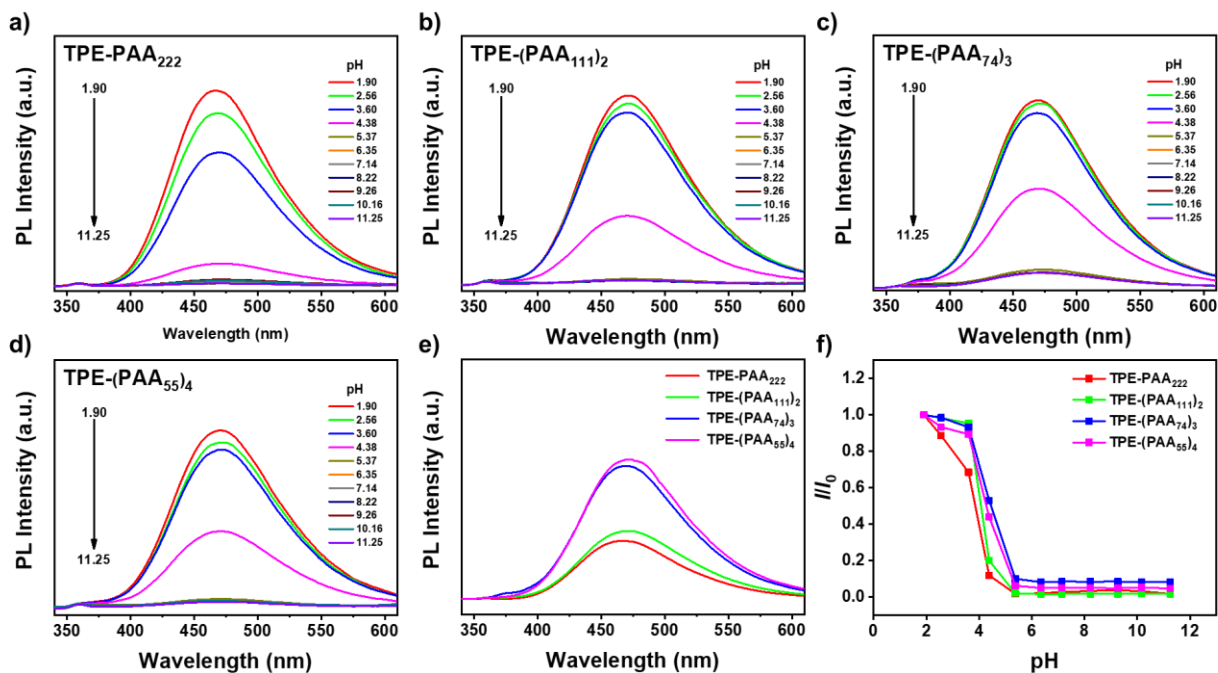

**Figure S15.** Photoluminescence (PL) spectra of (a) TPE-PAA<sub>222</sub>, (b) TPE-(PAA<sub>111</sub>)<sub>2</sub>, (c) TPE-(PAA<sub>74</sub>)<sub>3</sub> and (d) TPE-(PAA<sub>55</sub>)<sub>4</sub> in B-R buffer solutions of different pH values. (e) PL intensity of TPE-(PAA)<sub>n</sub> ( $n = 1-4$ , [AA]/[TPE-nBr] = 222/1) in B-R buffer solutions at pH = 1.90. (f)  $I/I_0$  of TPE-(PAA)<sub>n</sub> ( $n = 1-4$ ) at [AA]/[TPE-nBr] = 222/1. [TPE] = 20  $\mu$ M; excitation wavelength: 320 nm; and  $I_0$ : the PL intensity of TPE-(PAA)<sub>n</sub> in B-R buffer solution at pH 1.90.
